# Supplementary material for: Progression from remodeling to hibernation of ribosomes in zinc-starved mycobacteria
Source: PubMed Central journal article supplement — Proc Natl Acad Sci U S A. 2020 Jul 28;117(32):19528–37. doi: 10.1073/pnas.2013409117 (PMC7431043; doi:10.1073/pnas.2013409117), 2020-07-28
Supplement: pnas.2013409117.sapp.pdf [file pnas.2013409117.sapp.pdf]

# PNAS

www.pnas.org

1  
2  
3  
4  
5  
6  
7  
8  
9  
10  
11  
12  
13  
14  
15  
16  
17  
18  
19  
20  
21  
22  
23  
24  
25  
26  
27  
28  
29

## Supplementary Information for

### **Progression from remodeling to hibernation of ribosomes in zinc-starved mycobacteria**

Yunlong Li<sup>1</sup>, Jamie Corro<sup>1,2</sup>, Christopher Palmer<sup>3,4</sup>, Anil K. Ojha<sup>1,2\*</sup>

\*Corresponding authors:  
[anil.ojha@health.ny.gov](mailto:anil.ojha@health.ny.gov)

#### **This PDF file includes:**

- Supplementary text
- Figs. S1 to S11
- Tables S1 and S2
- References for SI reference citations

## 30 **Supplemental Text (Materials and Methods)**

### 31 **Bacterial growth medium**

32 Unless specified, *M. smegmatis* (mc<sup>2</sup>155) and *M. tuberculosis* strains (an attenuated  
33 mc<sup>2</sup>7000 strain and a virulent Erdman stain) were routinely maintained in Middlebrook  
34 7H9 + 10%ADC + 0.05% Tween-80 and 7H9 + 10%OADC + 0.05% Tween-80,  
35 respectively. Pantothenate (100 µg/mL) was added for cultures of *M. tuberculosis*  
36 (mc<sup>2</sup>7000). 7H10ADC and 7H11OADC agar plates were used for recombinant selections  
37 and colony growth of *M. smegmatis* and *M. tuberculosis*, respectively. For experiments  
38 related to analysis of ribosomes, cells were cultured in Sauton's medium with either zinc  
39 or zinc-chelator, N,N,N,N'-Tetrakis(2-pyridylmethyl)ethylenediamine (TPEN) added as  
40 specified. Pellicle biofilms of *M. tuberculosis* (mc<sup>2</sup>7000) were cultured in detergent-free  
41 Sauton's medium, either with 1mM ZnSO<sub>4</sub> or without supplemental zinc. Cells from log-  
42 phase planktonic cultures were inoculated at a 1:100 dilution into 4 mL of detergent-free  
43 Sauton's medium in a 12-well polystyrene plate and incubated without shaking for 7-  
44 weeks at 37 °C in humidified conditions. *Escherichia coli* strains (GC5 and BL21) were  
45 grown in LB broth or on LB agar plates at 37 °C. As necessary, 25 µg/mL zeocin, 20  
46 µg/mL kanamycin, 150 µg/mL (for *M. smegmatis* and *E. coli*) or 50 µg/mL (for *M.*  
47 *tuberculosis*) hygromycin, 50 µg/mL carbenicillin, and 5 µg/mL apramycin were used for  
48 selection.

### 49 **Construction of recombinant plasmids and strains**

50 Recombinant plasmids and bacterial strains used in this study are listed in SI Appendix,



51 Table S1. All target genes in *M. smegmatis* were mutated with a *zeo<sup>r</sup>* marker using a  
52 modified version of the PCR-based recombineering strategy as described previously (1).  
53 Oligonucleotides used for mutant constructions are provided in SI Appendix Table S2.  
54 Mutants were selected on 7H10ADC plate with 25 µg/mL zeocin, and the genotypes of  
55 the mutants were confirmed by PCR using primer pairs corresponding to sequences  
56 upstream or downstream of the corresponding target genes and the *zeo<sup>r</sup>* cassette.  
57 Deletion mutants of Rv3241c (*mpy<sub>Mtb</sub>*) in virulent (Erdman) and attenuated (mc<sup>2</sup>7000)  
58 strains of *M. tuberculosis*, and Rv0106 (*mrf<sub>Mtb</sub>*) in mc<sup>2</sup>7000 were constructed by a phage-  
59 based gene-replacement method as described earlier (2). The phAE87-based cosmid  
60 containing allelic exchange substrates for Rv3241c and Rv0106 (a gift from Dr. William  
61 Jacobs) were electroporated into *M. smegmatis* (mc<sup>2</sup>155) and incubated at 30 °C to  
62 recover recombinant plaques. Phages recovered from the plaques were transduced into  
63 *M. tuberculosis* strains to recover recombinants on 7H11OADC plates with 50 µg/mL  
64 hygromycin. Recombinant colonies were confirmed by PCR and DNA sequencing for the  
65 expected genotype. Integrative plasmids for expression of recombinant genes used either  
66 pMH94 (*kan<sup>r</sup>*), carrying the attachment site of L5 mycobacteriophage (1), or pTTPla (*kan<sup>r</sup>*)  
67 (a gift from Dr. Graham Hatfull), carrying the attachment site for mycobacteriophage  
68 Tweety (3), as the vectors. The integrative vector pTTPla (*apr<sup>r</sup>*) was constructed by  
69 replacing the *kan<sup>r</sup>* cassette in pTTPla with an *apr<sup>r</sup>* cassette using PstI and Asil sites. A  
70 hygromycin resistant derivative of pJL37 – pJL37(*hyg<sup>r</sup>*) – was constructed by replacing  
71 the *kan<sup>r</sup>* cassette flanked by SpeI and NheI sites in pJL37, with the *hyg<sup>r</sup>* cassette, excised  
72 using XbaI and NheI from pYUB854.

73 Plasmids for CRISPRi based depletion of Clp proteases, provided by Drs. Keith  
74 Derbyshire and Todd Gray, were constructed as a part of the Mycobacterial Systems  
75 Resource (Canestrari et al. manuscript under preparation). Briefly, small guide RNA  
76 (sgRNA) were designed 5' to the optimal PAM sites in *clpP1* and *clpP2*. Oligonucleotide  
77 templates based on the sgRNA were PCR amplified and cloned by in-fusion into the  
78 BsmB1 site of pJR962 (4), an L5-attP based integrative vector (*kan<sup>r</sup>*) harboring  
79 tetracycline (Tet)-inducible sgRNA and dCas9 systems. The resulting plasmids (pYL205  
80 and pYL206) were sequenced to confirm the sgRNA sequence, and electroporated into  
81 a  $\Delta zur$  strain.

## 82 **Recombinant protein expression, purification and analysis**

83 For purification of His-tagged recombinant Mpy (rMpy), the *mpy* (Msmeg\_1878) gene was  
84 cloned into pET21b vector using NdeI and XhoI (pYL140), and introduced into BL21  
85 (DE3) pLysS cells for Mpy expression. The transformed BL21 cells were grown in 500 mL  
86 of LB medium with 50  $\mu\text{g/mL}$  of carbenicillin until late log phase ( $\text{OD}_{600}$  of 0.8) at 37 °C,  
87 and rMpy expression was induced with 1 mM IPTG for an additional 4 hours at 37°C.  
88 Cells were harvested by centrifugation at 8000 rpm in a Thermo Scientific™ Fiberlite™  
89 F12-6  $\times$  500 fixed-angle rotor for 20 minutes, and were resuspended in 20 mL of N-I buffer  
90 (50 mM Tris pH 8.0, 300 mM NaCl, 5% glycerol, 10 mM imidazole, 1 mM PMSF) prior to  
91 sonication at the 30% amplitude for 20 cycles of 10 second pulse every 10 second  
92 interval. The sonicate was clarified by centrifugation (13000 rpm, 20 minutes, 4 °C,  
93 Thermo Scientific™ F21-8  $\times$  50y fixed-angle rotor) and the supernatant was mixed with 2  
94 mL Ni-NTA resin (pre-equilibrated with N-I buffer) for 1 hour at 4 °C. The protein-bound

95 resin was washed five times with 10 mL of N-II buffer (50 mM Tris pH 8.0, 300 mM NaCl,  
96 5 % glycerol, 40 mM imidazole). Mpy<sub>6XHis</sub> was eluted with 6 mL N-III buffer (50 mM Tris-  
97 pH 8.0, 300 mM NaCl, 5% glycerol, 250 mM imidazole). Imidazole was removed by  
98 dialysis against the storage buffer (50 mM Tris pH 8.0, 300 mM NaCl and 50% glycerol).

99 For purification of FLAG-tagged Mrf from high-zinc cultures, YL27 strain  
100 expressing Mrf-FLAG from acetamide inducible promoter (pYL218) in CrisPRi-ClpP1  
101 background was constructed. YL27 cells were grown in 500 mL Sauton's medium with 1  
102 mM ZnSO<sub>4</sub> until an OD of 0.8, when 0.2 % (vol/vol) acetamide was added. Cells were  
103 grown for a further 62 hours for induction of Mrf-FLAG before adding Atc (100 ng/mL) to  
104 deplete ClpP1 for additional six hours. For purification of FLAG-tagged Mrf from a low-  
105 zinc culture, YL18 cells were cultured in 500 mL Sauton's medium with 1 μM TPEN for  
106 96-hour. Cells were harvested at 8000 rpm in Thermo Scientific™ Fiberlite™ F12-6 x 500  
107 fixed-angle rotor for 20 minutes, and resuspended in 20 mL of buffer containing 50 mM  
108 Tris pH 8.0, 150 mM NaCl, 10% glycerol, 1 mM EDTA, 0.1% Triton X-100, 1 mM PMSF  
109 and sonicated (amplitude-30% with 10 second pulses at 10 second intervals) for 60  
110 minutes. The sonicate was clarified by centrifugation (13,000 rpm, 20 minutes, 4 °C,  
111 Thermo Scientific™ F21-8 x 50y fixed-angle rotor) and the supernatant was mixed with 1  
112 ml Pierce™ Anti-FLAG Magnetic Agarose overnight at 4 °C. The protein bound FLAG  
113 agarose was washed five times with 10 mL buffer containing 50 mM Tris pH 8.0, 150 mM  
114 NaCl, 10% glycerol and 1 mM EDTA. Mrf-FLAG was then eluted with 2 mL buffer  
115 containing 50 mM Tris pH 8.0, 150 mM NaCl, 10% glycerol, 1 mM EDTA and 1.5 mg/mL  
116 of 3XFLAG peptides (Pierce). The purified Mrf-FLAG proteins (20 μg) were transferred

117 on PVDF membrane for N-terminal sequencing by Edman degradation on ABI Precise  
118 494HT instrument at the Tufts university proteomics core facility.

119 For purification of Mrf\*, YL35 strain expressing Mrf\*-FLAG was grown in Sauton's  
120 medium with 0.2% succinate and 1  $\mu$ M TPEN for 28 hours, after which Mrf\*-FLAG  
121 expression was induced by adding 0.2% acetamide for additional 16 hours. Mrf\*-FLAG  
122 was then purified using the method described for purification of Mrf-FLAG.

### 123 **Ribosome purification and analysis**

124 Ribosomes were purified as described previously (1, 5), with a few modifications. As  
125 necessary, planktonic or biofilms of indicated strains of *M. smegmatis* (mc<sup>2</sup>155) and Mtb  
126 (mc<sup>2</sup>7000) cells were grown in Sauton's medium, either with the specified amounts of  
127 zinc, without zinc, or with 1 mM TPEN. About 500 mL planktonic cells or four 12-well  
128 plates of Mtb (mc<sup>2</sup>7000) pellicle biofilms (spooled in PBS with 0.05% Tween-80) were  
129 harvested (8000 rpm, 20 minutes, 4 °C in Thermo Scientific™ Fiberlite™ F12-6 × 500  
130 fixed-angle rotor) and flash frozen in liquid nitrogen. Frozen cells were pulverized 6 times  
131 for *M. smegmatis* or 8 times for Mtb at 15 Hz for 3 minutes in a mixer mill (Retsch MM400).  
132 The pulverized cell lysates were mixed with 20 mL of ice-cold HMA-10 buffer (20 mM  
133 HEPES-K pH 7.5, 30 mM NH<sub>4</sub>Cl, 10 mM MgCl<sub>2</sub>, 5 mM  $\beta$ -mercaptoethanol) and  
134 centrifuged (15,000 rpm, 30 minutes, 4 °C, in Thermo Scientific™ F21-8 x 50y fixed-  
135 angle rotor). The supernatants were transferred into the Beckman PC ultracentrifuge  
136 tubes (Beckman 355618) and treated with 3 units/mL RNase-free DNase (Ambion) for  
137 one hour at 4 °C and then centrifuged (35000 rpm, 1 hour, 4 °C in a Beckman rotor Type

138 70Ti) to separate ribosomes from other low molecular weight cellular contents. The  
139 ribosome pellet (P1) was harvested and resuspended in 10 mL HMA-10 buffer and  
140 layered on top of a 10 mL 32% sucrose solution in HMA-10 buffer and centrifuged for 16  
141 hours at 37,000 rpm in a Beckman Type 70Ti rotor. The supernatant was discarded and  
142 the ribosome pellet (P2) was briefly rinsed and then solubilized in HMA-10 buffer. The  
143 ribosomes were quantified by measuring absorbance at 260 nm. Ribosomes collected on  
144 the sucrose cushion were used for determining the relative abundance of FLAG-tagged  
145 Mrf, Mpy and other individual ribosomal proteins.

146 To analyze individual subunits, the ribosome pellet P2 was loaded on a 12 mL of  
147 10-40% sucrose density gradient (SDG) and centrifuged for 5 hours at 4 °C, at 35,000  
148 rpm in a Beckman SW41 rotor. For purifying individual subunits, the ribosome pellet P2  
149 was layered on top of 40 mL sucrose gradients (10%-40%) in the HMA-10 buffer and  
150 centrifuged for 16 hours at 24,000 rpm in a Beckman rotor SW28. The gradients were  
151 fractionated using the density gradient fractionation system (Brandel). Fractions  
152 corresponding to 30S, 50S and 70S ribosomes were pooled separately and further  
153 pelleted by ultracentrifugation at 42,800 rpm for 3 hours in Beckman rotor Type 70Ti and  
154 resuspended in HMA-10 buffer. For Western blot analysis, 200  $\mu$ L of individual fractions  
155 were mixed with 800  $\mu$ L methanol, 200  $\mu$ L chloroform and 600  $\mu$ L H<sub>2</sub>O sequentially,  
156 followed by centrifugation at 13000 rpm, 5 minutes in a benchtop centrifuge (Eppendorf  
157 5415D). The top aqueous layer was gently removed, leaving the interface. The interface  
158 containing protein precipitates and the organic layer were mixed with 800  $\mu$ L methanol  
159 and the mixture was centrifuged at 13,000 rpm for 5 minutes. The pellet was resuspended

160 in 1X SDS loading buffer for analysis by immunoblot.

161 For *in vitro* analysis of rMpy binding to ribosomes, 24 pmoles of ribosomes  
162 collected on sucrose cushion (P2) were incubated with 24, 48 or 96 pmoles of rMpy in  
163 HMA-10 buffer for 1 hour at 37 °C. The reactions were then layered on top of 5 mL SDG  
164 (5%-30%) in HMA-10 buffer and centrifuged at 35,000 rpm for 2 hours and 45 minutes in  
165 a Beckman rotor SW55. The fractions corresponding to 70S were pooled, precipitated by  
166 chloroform methanol method as described above, and analyzed by immunoblot.

167 For large-scale purification of 30S and 50S subunits for subunit reassociation  
168 studies, low magnesium (1 mM MgCl<sub>2</sub>) buffer was used for dissociating the 70S ribosome  
169 prior to SDG. Briefly, the ribosome pellet (P1) was resuspended in HMA-1 buffer (20 mM  
170 HEPES-K pH 7.5, 30 mM NH<sub>4</sub>Cl, 1 mM MgCl<sub>2</sub>, 5 mM β-mercaptoethanol) and layered on  
171 top of 40 mL SDG (10%-40%) in HMA-1 buffer and centrifuged for 16 hours at 24,000  
172 rpm in a Beckman rotor SW28. The gradients were fractionated by the Brandel  
173 fractionation system. The pooled 30S, 50S fractions were further pelleted by  
174 ultracentrifugation at 42,800 rpm for 3 hours in Beckman rotor Type 70Ti and  
175 resuspended in HMA-10 buffer. The subunits were quantified and stored at -80 °C until  
176 further use.

177 For the ribosome reassociation assay in the presence or absence of rMpy, 36  
178 pmoles each of the 30S (from low-zinc culture of either YL4 or YL25 strain) and 50S (from  
179 low-zinc culture of YL4 strain) subunits were mixed either with or without 72 pmoles of  
180 rMpy in HMA-10 buffer with 30 mM KCl. The mixture was incubated for 1 hour at 37 °C,  
181 then layered on top of 12 mL 10%-40% sucrose gradients in HMA-10 buffer and

182 centrifuged at 35,000 rpm for 5 hours in a Beckman rotor SW41. The gradients were then  
183 fractionated using the density gradient fractionation system (Brandel). The 70S fractions  
184 were pooled and precipitated as described above. The abundance of rMpy in 70S  
185 ribosomes was determined by immunoblot.

### 186 ***In vitro* translation assay**

187 A synthetic DNA template (a gift from Drs. Todd Gray and Keith Derbyshire) containing a  
188 T7 promoter and a Shine-Dalgarno sequence cloned upstream of the Nano-Luc reporter  
189 coding sequence *was* used for the *in vitro* translation assay. The assay was performed  
190 using a PURExpress®  $\Delta$  Ribosome Kit (New England BioLabs Inc.). The protein synthesis  
191 reaction was set up according to manufacturer's instructions with few modifications.  
192 Briefly, 2.0  $\mu$ L of Solution A and 0.6  $\mu$ L of Factor Mix from the kit were mixed with 12.5  
193 nM of ribosomes purified on a sucrose cushion and 18 ng of DNA template in a total  
194 volume of 5  $\mu$ L. After 1 hour of incubation at 37 °C, 2  $\mu$ L of the reaction was mixed with  
195 18  $\mu$ L of H<sub>2</sub>O, 20  $\mu$ L luciferase assay buffer and 0.4  $\mu$ L luciferin substrate (Nano-Glo®  
196 Luciferase Assay system, Promega Inc.). After 5 minutes of incubation at room  
197 temperature, relative luminescence unit (RLU) produced from the translated luciferase  
198 was measured according to manufacturer's instructions using a Veritas Microplate  
199 Luminometer (Turner Biosystems).

### 200 **Immunoblotting**

201 Culture aliquots of indicated *M. smegmatis* strains – 5 mL for  $\geq$ 96h or 10 mL for early  
202 time points – were harvested at 4000 rpm for 10 minutes. The cell pellets resuspended

203 in 800  $\mu$ L of lysis buffer (PBS, 1 mM PMSF, 0.1% Triton X-100, 1 mM EDTA) were  
204 disrupted by bead-beater, and centrifuged at 13000 rpm for 10 minutes. The  
205 concentrations of the cell lysates were determined by Bradford assay. Proteins  
206 equivalent to 200  $\mu$ g from each lysate were then mixed with 25  $\mu$ L 4X SDS loading  
207 buffer (100  $\mu$ L total volume) and heated for 10 minutes at 95  $^{\circ}$ C. Equal amounts (20  
208  $\mu$ g) of denatured proteins from each lysates were resolved in 8% SDS-PAGE gel (For  
209 Mrf) or 12% SDS-PAGE gel (for GroEL, Mpy or r-proteins) and proteins were  
210 transferred to PVDF membranes. The membranes were blocked, washed and probed  
211 with indicated antibodies [GroEL (Enzo, rabbit 1:5000); S14c- (in-house, rabbit, 1:1000);  
212 Mpy (in-house, rabbit, 1:5000); FLAG-HRP (Genescript, rabbit, 1:5000); S13 (DSHB,  
213 mouse, 5  $\mu$ g/mL corresponding to 1:100); 6XHis-tag (Thermo, mouse, 1:2000)]. As  
214 necessary, the membranes were incubated with secondary HRP conjugated antibody  
215 (1:5000). The membranes were developed with ECL reagents (Thermo fisher) and  
216 exposed to chemiluminescence films, developed and scanned. Densitometric analysis  
217 of protein bands were performed by Image J, and signal in each lane was quantified  
218 relative to a reference after normalizing the signals with the corresponding loading  
219 control, as indicated for each sample.

## 220 **ICP-MS analysis**

221 *M. smegmatis* cells were cultured in Sauton's medium containing either 1mM ZnSO<sub>4</sub>  
222 or 1 $\mu$ M TPEN. At indicated time points, 10-30 mL aliquots were drawn out and cells were  
223 harvested by centrifugation. Harvested cells were washed thrice with doubled-deionized  
224 ( $\geq$  18.0 M $\Omega$ .cm) zinc-free water in acid-washed, zinc-free polypropylene tubes (Sarstedt



225 Inc.), and heat-killed for 20 minutes at 95 °C. Cells equivalent to 0.1-0.4 mg of dry weight  
226 of biomass were washed with 5% v/v double-distilled HNO<sub>3</sub>, and analyzed for zinc (Zn)  
227 using a Thermo Scientific™ X Series 2 Inductively Coupled Plasma-Mass Spectrometer  
228 (ICP-MS) at the Wadsworth Center's Trace Elements Laboratory (New York State  
229 Department of Health, Albany, New York, USA). Eight multielement intermediate  
230 calibration standards (containing Zn) were prepared from a NIST-traceable stock solution  
231 (High Purity Standards, Charleston, SC, USA). Working standards and working liquid  
232 samples were prepared by performing a 1+49 dilution (200 μL of sample diluted into a  
233 final 10 mL volume) of the intermediate standard/media sample into a diluent solution.  
234 The diluent solution contained 0.5% v/v double-distilled nitric acid, 0.005% Triton™ X-  
235 100, 1 μg/L Ga, and 1 mg/L Au. Gallium served as the internal standard for Zn, i.e., the  
236 measured <sup>66</sup>Zn signal for each sample was corrected against the <sup>71</sup>Ga response to  
237 compensate for any instrumental drift encountered during an analytical run. Harvested  
238 cells of known weight were digested at room temperature in 5 mL double-distilled HNO<sub>3</sub>  
239 overnight, to ensure complete sample solubilization. The solubilized sample was then  
240 diluted and analyzed. All of the plasticware used in this study were acid washed with 5%  
241 v/v double-distilled HNO<sub>3</sub>, to minimize any background Zn contamination prior to use.  
242 Additionally, all of the samples were prepared for analysis in a SterilGARD® e3 Class II,  
243 Type A2 Biological Safety Cabinet (The Baker Company, Sanford, MA) which was  
244 determined to meet ISO 5 (Class 100) clean standards. All other preparation work was  
245 performed under Class 100 clean room conditions or better (Terra Universal, Fullerton,  
246 CA). Method accuracy was assessed throughout the study by analyzing three levels of

247 internal quality control material (IQC), with Zn target values established against National  
248 Institute of Standards and Technology (NIST) Standard Reference Materials (SRMs).

249 For determining zinc in Mrf, only polystyrene tubes and polypropylene beakers and  
250 cylinders were used, which were rinsed with zinc-free water several times before use.  
251 The contaminating zinc in the exchange buffer (B) (50 mM Tris pH 8.0, 150 mM NaCl,  
252 10% glycerol) was removed by Chelex-100 (Sigma). YL18 strain expressing Mrf-FLAG  
253 was grown in Sauton's medium with 1  $\mu$ M TPEN for 4 days. The FLAG-tagged proteins  
254 were purified as described earlier, and dialyzed in zinc-free exchange buffer. After  
255 dialysis, 100 $\mu$ l exchange buffer (B0) and each protein sample (P0) were kept aside for  
256 ICP-MS. A known quantity of the remaining protein in the sample was further dialyzed in  
257 the exchange buffer containing 8-times molar excess of ZnSO<sub>4</sub> for 4 hours, followed by  
258 three sequential dialysis with zinc-free exchange buffer for 4, 2 and 2 hours. After dialysis,  
259 100 $\mu$ l of the exchange buffer (B1) from last dialysis was kept aside, and concentration of  
260 protein in each sample (P1) after dialysis was determined. A second set of protein (P2)  
261 for each sample was similarly treated with zinc. The zinc contents in all the buffer  
262 (B0/B1/B2) and protein (P0/P1/P2) were determined by ICP-MS. The background value  
263 in the buffers was subtracted from each corresponding sample before determining zinc  
264 to protein ratio for the protein.

### 265 **Immunoprecipitation**

266 The strains YL16 or YL17 used for testing interaction between Mrf and ClpS, were grown  
267 in 500 mL Sauton's medium either with 1mM ZnSO<sub>4</sub> until an OD<sub>600</sub> 0.8, or with 1 $\mu$ M

268 TPEN for 4 days. The zinc-rich cultures were induced for 6 hours with 100 ng/mL  
269 anhydrotetracycline (Atc) to inhibit ClpP1. The cells were harvested at 8000 rpm (Thermo  
270 Scientific™ Fiberlite™ F12-6 × 500 fixed-angle rotor) for 20 minutes, and resuspended in  
271 20 mL of buffer A (50 mM Tris pH 8.0 150 mM NaCl, 10 % glycerol, 1mM PMSF and 10  
272 mM imidazole. After sonication (amplitude 30% and 10 sec on/off cycle on ice) for 60  
273 minutes, cellular debris was removed by centrifugation at 13000 rpm (Thermo Scientific™  
274 Fiberlite™ F12-6 × 500 fixed-angle rotor) for 20 minutes, and the supernatants were  
275 incubated with 2 mL Ni-NTA resin (pre-equilibrated in buffer A) for 1 hour. The protein-  
276 bound Ni-NTA resin was washed with 10 mL buffer A containing 40 mM imidazole five  
277 times. The protein bound on the Ni-NTA resin was eluted with buffer A containing 250  
278 mM imidazole. The eluted samples, along with lysates and washes as controls, were  
279 analyzed for ClpS<sub>6XHis</sub> and Mrf-FLAG by immunoblot using anti-FLAG and anti-6xHis  
280 antibodies.

281 For analysis of <sup>35</sup>S-labeled Mrf by immunoprecipitation (IP), cells of YL7 strain were  
282 grown in 12 mL Sauton's medium with 1 μM TPEN at 37°C for 4 days on a shaker at the  
283 speed of 200 rpm. Cells from 6 mL culture were harvested and the supernatant (S<sub>0</sub>) was  
284 filter-sterilized and saved, while 60 μCi <sup>35</sup>S-Methionine (PerkinElmer) was added to the  
285 remaining 6 mL culture and cells were labeled for 2 hours. After 2 hours, labeled cells  
286 were washed with PBS + 0.05% Tween-80 three times, and resuspended in S<sub>0</sub>  
287 supernatant, and split into three 2 mL aliquots. Cells from one aliquot were immediately  
288 harvested (13000 rpm for 2 minutes) and frozen for downstream processing. Zinc was  
289 supplemented in one of the remaining two aliquots at the final concentration of 1 mM

290 ZnSO<sub>4</sub>, while the other aliquot was untreated. Both aliquots were incubated for 37°C for  
291 1 hour, after which cells were harvested (13000 rpm for 2 minutes) and processed for IP.  
292 For IP, harvested cells were resuspended in 800 µL lysis buffer (50 mM Tris pH 8.0, 150  
293 mM NaCl, 10% glycerol, 1 mM EDTA, 0.1% Triton X-100, 1 mM PMSF), and disrupted by  
294 bead-beater. Cell lysates were centrifuged at 13000 rpm for 10 minutes, and supernatants  
295 equivalent to 12000000 cpm were diluted to 500 µL with the lysis buffer and incubated  
296 with either 100 µL FLAG magnetic beads (Thermal Fisher) or 5 µg of GroEL antibody  
297 (Enzo Life Sciences) for 2 hours at room temperature. For IP with GroEL, the cell lysates  
298 with GroEL antibody mixture were also mixed with 50 µL Protein A/G magnetic beads  
299 (Thermo Fisher) and further incubated for 1 hour at room temperature. The magnetic  
300 beads were collected with a magnetic stand and the supernatant was discarded. The  
301 beads were washed three times with the wash buffer (50 mM Tris pH 8.0, 150 mM NaCl,  
302 10% glycerol, 1 mM EDTA, 0.1% Triton X-100) and one time with distilled water. The  
303 beads were resuspended in 30 µL 1X SDS protein loading buffer and heated at 95°C for  
304 10 minutes. The supernatants were collected after separating the beads using a magnetic  
305 stand. The collected supernatants were resolved on 8% SDS-PAGE gel, fixed in buffer  
306 containing 10% glacial acetic acid, 20% methanol for 30 minutes, dried at 80 °C for 1  
307 hour, and autoradiographed.

### 308 **Analysis of *in vivo* protein synthesis with <sup>35</sup>S-methionine**

309 YL2 strain was grown at 37 °C in Sauton's medium with 1 µM TPEN. Two mL aliquots of  
310 cells were taken from 15-, 24- and 96-hour post inoculation and mixed with 20 µCi <sup>35</sup>S-  
311 Methionine (PerkinElmer) at 37 °C for 10 minutes, after which aliquots were flash frozen

312 in dry ice. Frozen cells were harvested (13000 rpm for 2 minutes) and resuspended in  
313 300  $\mu$ L of lysis buffer (50 mM Tris pH 8.0, 150 mM NaCl, 10% glycerol, 1 mM EDTA,  
314 0.1% Triton X-100, 1 mM PMSF), and disrupted by bead-beater (5 cycles of 30 sec). Cell  
315 lysates were centrifuged at 13000 rpm for 10 minutes, and protein concentration in each  
316 sample was determined. Five micrograms of total proteins from each sample were  
317 resolved on a 12% SDS-PAGE gel. The gel was first stained with Coomassie blue, then  
318 fixed in buffer containing 10% glacial acetic acid and 20% methanol for 30 minutes, dried  
319 at 80 °C for 1 hour, and autoradiographed.

### 320 **qRT-PCR**

321 Total RNA extraction and qRT-PCR were performed as previously described (1). Briefly,  
322 10 ng total cDNA prepared from DNA-free RNA and 1  $\mu$ L of 5  $\mu$ M primers were mixed with  
323 10  $\mu$ L 2X SYBR Green master mix. Real time PCR was performed on an ABI 7000  
324 instrument at: 95 °C 10min, followed by 40 cycles of 95 °C 10 sec and 60 °C 1min. SigA  
325 and non-template controls were set up for the endogenous and negative controls,  
326 respectively.

### 327 **Zinc-binding assay using FluoZin-3**

328 To determine the linear range of FluoZin<sup>TM</sup>-3 assay (cell impermeant, Invitrogen), 10  $\mu$ M  
329 of the probe was mixed with 0.1, 0.5, 1, 2, 4 or 6  $\mu$ M of ZnSO<sub>4</sub> in 100  $\mu$ L of zinc-free buffer  
330 (buffer B: 50 mM Tris pH 8.0, 150 mM NaCl, 10% glycerol: chelated with Chelex-100) and  
331 the mixtures were incubated at 37 °C for 10 minutes. The zinc-free buffer mixed with  
332 FluoZin<sup>TM</sup>-3 was used as a background. After incubation, fluorescence was measured at

333 excitation/emission of 494 nm/516 nm. The background value was subtracted from the  
334 experimental values, and the signal was plotted as a function of zinc concentration.

335 To determine zinc affinity of Mrf-FLAG and Mrf\*-FLAG, proteins were purified in  
336 the presence of EDTA from low-zinc cultures of YL18 and YL35, as described earlier in  
337 this document. The purified proteins were dialyzed against the zinc-free buffer (buffer B)  
338 to remove EDTA. A 2-fold serial dilutions of the proteins in 0.004 to 5  $\mu$ M range were  
339 mixed with 5  $\mu$ M ZnSO<sub>4</sub> in 100  $\mu$ L zinc-free buffer (buffer B) and the mixtures were  
340 incubated at room temperature for 30 minutes. After incubation, the reactions were  
341 transferred to Pierce™ Protein Concentrators PES (10K MWCO, 0.5 mL) and centrifuged  
342 at 5000g for 3 minutes. The filtrates containing free zinc ions in collection tubes were  
343 adjusted to 100  $\mu$ L with zinc-free buffer (buffer B) and mixed 10  $\mu$ M FluoZin™-3 before  
344 incubated at 37°C for 10 minutes. A 100  $\mu$ L reaction containing 5  $\mu$ M ZnSO<sub>4</sub> and 10  $\mu$ M  
345 FluoZin™-3 in zinc-free buffer was set up as the control. After 10 minutes of incubation  
346 fluorescence was measured as described above. The % Zn<sub>free</sub>/Zn<sub>total</sub> in a sample was  
347 determined fluorescence<sub>sample</sub>/fluorescence<sub>control</sub> x 100. The % Protein-Zn complex was  
348 determined by 100% – (% Zn<sub>free</sub>/Zn<sub>total</sub>).

### 349 **Ribosome degradation assay**

350 The assay was performed as described earlier (1, 6). Briefly, pellicle biofilms of mc<sup>2</sup>7000,  
351  $\Delta$ mpy<sub>Mtb</sub> and a complementing strain were cultured in Sauton's medium with 1  $\mu$ Ci/mL of  
352 [<sup>3</sup>H]-uridine (Perkin Elmer), 0.1 mM uridine (Sigma-Aldrich), and either 1 mM ZnSO<sub>4</sub> or  
353 without supplemental zinc for 7 weeks. The pellicles were harvested, washed three times  
354 with PBS + 0.1% Tyloxapol, and resuspended in PBS containing 0.05% Tyloxapol, 0.1

355 mM uridine, 100 µg/mL pantothenate. 1mM ZnSO<sub>4</sub>, was added to PBS for cells that were  
356 cultured in zinc-rich medium. The acid-soluble radioactivity and the total radioactivity in  
357 the culture were determined by Liquid Scintillation Analyzer (Perkin Elmer, Tri-  
358 Carb®4910TR), as previously described (1, 6).

### 359 **Antibiotic sensitivity assay**

360 Pellicles of mc<sup>2</sup>7000 and derivative strains were cultured in Sauton's medium either with  
361 1 mM ZnSO<sub>4</sub> (for high-zinc) or without supplemental zinc for 7 weeks. Cells in the pellicles  
362 were washed three times with PBS + 0.1% tyloxapol. About 10<sup>8</sup> CFU/mL of cells were  
363 resuspended in PBS with 0.05% tyloxapol and zinc (either 1 mM ZnSO<sub>4</sub> for high-zinc  
364 cultures or no supplemental zinc for low-zinc cultures). Streptomycin (5 µg/mL) was then  
365 added to the cultures and viable cells were enumerated by plating dilutions on  
366 7H11OADC at the indicated time points.

### 367 **Animal infection and drug treatment**

368 All animal experiments were approved by the Institutional Animal Care and Use  
369 Committee (IACUC) of the Wadsworth Center. Using a Glas-Col aerosolizer (Glas-Col  
370 Inc.), 60-day old C3HeB/FeJ female and male mice were infected with aerosolized  
371 particles of *M. tuberculosis* (Erdman) and its derivative mutants at a density of 10<sup>6</sup>  
372 CFU/mL. Default aerosolization settings of the instruments were used for each cycle of  
373 exposure: 10 minutes nebulization, 15 minutes of cloud time and 10 minutes of exhaust.  
374 Three mice from each group were euthanized after 24 hours of infection to determine the  
375 initial bacterial burden, which ranged from 50-100 bacilli per lung. At 6-week post-

376 infection, four mice from each group were euthanized for the analysis of bacterial burden.  
377 Half of the mouse population from each group were administered with streptomycin  
378 subcutaneously @200 mg/kg/day, 5 days a week, for up to 8 weeks. Remaining mice  
379 from each group were administered with PBS as placebo. At 4- and 8-weeks post  
380 antibiotic treatment, five mice from each group were euthanized, and lung homogenates  
381 were plated on 7H11OADC to determine the bacterial burden.

382



383 **Table S1: List of plasmids and strains**

|      | Plasmids                 | Remarks                                                                                                                                                                                                                               | Reference  |
|------|--------------------------|---------------------------------------------------------------------------------------------------------------------------------------------------------------------------------------------------------------------------------------|------------|
|      | pJl37                    | <i>P<sub>hsp60</sub></i> -based expression vector for mycobacteria; <i>kan<sup>r</sup></i>                                                                                                                                            | (1)        |
|      | pMH94                    | L5-attP-based integrative vector for mycobacteria; <i>kan<sup>r</sup></i>                                                                                                                                                             | (1)        |
|      | pYUB854                  | Cosmid vector, <i>hyg<sup>r</sup></i>                                                                                                                                                                                                 | (1)        |
|      | pTTPla                   | Tweety-attP-based integrative vector for mycobacteria; <i>kan<sup>r</sup></i>                                                                                                                                                         | (3)        |
|      | pJV53-SacB               | Sucrose-sensitive marker SacB cloned in pJV53 @ <i>SpeI</i> site; <i>kan<sup>r</sup></i>                                                                                                                                              | (1)        |
|      | pLAM12                   | <i>P<sub>acatamidase</sub></i> -based expression vector for mycobacteria; <i>kan<sup>r</sup></i>                                                                                                                                      | (7)        |
|      | pYL3                     | <i>kan<sup>r</sup></i> cassette in pMH94 @ <i>EcoRV</i> & <i>NotI</i> sites is replaced by <i>hyg<sup>r</sup></i> cassette from pYUB854; <i>hyg<sup>r</sup></i>                                                                       | (1)        |
|      | pYL11                    | <i>kan<sup>r</sup></i> cassette in pJL37 @ <i>NheI</i> & <i>SpeI</i> is replaced by <i>hyg<sup>r</sup></i> cassette from pYUB854 @ <i>NheI</i> & <i>XbaI</i> ; <i>hyg<sup>r</sup></i>                                                 | (1)        |
|      | pYL42                    | <i>MSMEG_6065-6070</i> including <i>P<sub>zurbox</sub></i> cloned in pYL3 @ <i>SacI</i> & <i>XbaI</i> ; <i>hyg<sup>r</sup></i>                                                                                                        | (1)        |
|      | pYL40                    | Internal deletion in <i>mrf</i> ( <i>Msmeg_6069</i> ) on pYL42 backbone @ <i>SacI</i> & <i>XbaI</i> , <i>hyg<sup>r</sup></i>                                                                                                          | (1)        |
|      | pYL140                   | <i>mpy</i> ( <i>Msmeg_1878</i> ) cloned in pET21b @ <i>NdeI</i> & <i>XhoI</i> ; <i>amp<sup>r</sup></i>                                                                                                                                | This study |
|      | pYL141                   | C-terminally FLAG-tagged <i>mrf</i> and its 543 bp UPS with native promoter ( <i>P<sub>zurbox</sub></i> ) cloned in pJL37 @ <i>XbaI</i> & <i>NheI</i> sites; <i>kan<sup>r</sup></i>                                                   | (1)        |
|      | pYL148                   | <i>Rv_3241c</i> + 800 bp UPS cloned in pMH94 @ <i>SacI</i> & <i>XbaI</i> ; <i>kan<sup>r</sup></i>                                                                                                                                     | This study |
|      | pYL149                   | <i>Rv_0106</i> + 542 bp UPS cloned in pMH94 @ <i>SacI</i> & <i>XbaI</i> ; <i>kan<sup>r</sup></i>                                                                                                                                      | This study |
|      | pYL150                   | C-terminally FLAG-tagged <i>mrf</i> , and its 543 bp UPS with mutations changing <i>P<sub>zurbox</sub></i> into constitutive ( <i>P<sub>const</sub></i> ), cloned in pJL37 @ <i>XbaI</i> & <i>NheI</i> sites ; <i>kan<sup>r</sup></i> | This study |
|      | pYL155                   | C-terminally FLAG-tagged <i>mrf</i> with <i>P<sub>zurbox</sub></i> cloned in pTTPla @ <i>SacI</i> & <i>XbaI</i> sites; <i>kan<sup>r</sup></i>                                                                                         | This study |
|      | pYL156                   | C-terminally FLAG-tagged <i>mrf</i> with <i>P<sub>const</sub></i> cloned in pTTPla @ <i>SacI</i> & <i>XbaI</i> sites; <i>kan<sup>r</sup></i>                                                                                          | This study |
|      | pYL178                   | pYL155 carrying <i>Mrf<sub>H36A/H41A/H62A/H81A/C64A/C67A</sub></i> mutations ( <i>Mrf<sup>*</sup></i> ); <i>kan<sup>r</sup></i>                                                                                                       | This study |
|      | pYL180                   | <i>kan<sup>r</sup></i> cassette in pTTPla replaced with the apramycin resistance ( <i>apr<sup>r</sup></i> ) cassette @ <i>PstI</i> and <i>AsiSI</i> sites; <i>apr<sup>r</sup></i>                                                     | This study |
|      | pYL181                   | C-terminally FLAG-tagged <i>mrf</i> with <i>P<sub>zurbox</sub></i> cloned in pYL180 @ <i>SacI</i> & <i>XbaI</i> sites; <i>apr<sup>r</sup></i>                                                                                         | This study |
|      | pYL205                   | L5-attP-based integrative vector carrying tet-inducible dCas9 and gRNA complementary to <i>Clpp2</i> ; <i>kan<sup>r</sup></i>                                                                                                         | This study |
|      | pYL206                   | L5-attP-based integrative vector carrying tet-inducible dCas9 and gRNA complementary to <i>Clpp1</i> ; <i>kan<sup>r</sup></i>                                                                                                         | This study |
|      | pYL210                   | <i>mrf</i> with FLAG tag at C- terminal cloned in pLAM12 @ <i>NdeI</i> & <i>NheI</i> ; <i>kan<sup>r</sup></i>                                                                                                                         | This study |
|      | pYL212                   | <i>kan<sup>r</sup></i> cassette in pYL178 replaced with the <i>apr<sup>r</sup></i> cassette @ <i>PstI</i> and <i>AsiSI</i> sites; <i>apr<sup>r</sup></i>                                                                              | This study |
|      | pYL216                   | <i>Msmeg_4910</i> with HIS <sub>6</sub> -tag at C- terminal cloned in pYL11 @ <i>NdeI</i> & <i>NheI</i> ; <i>hyg<sup>r</sup></i>                                                                                                      | This study |
|      | pYL218                   | <i>kan<sup>r</sup></i> cassette in pYL210 @ <i>SpeI</i> & <i>NheI</i> is replaced by <i>hyg<sup>r</sup></i> cassette from pYUB854 @ <i>NheI</i> & <i>XbaI</i> ; <i>hyg<sup>r</sup></i>                                                | This study |
|      | pYL222                   | pLAM12 carrying <i>Mrf<sub>H36A/H41A/H62A/H81A/C64A/C67A</sub></i> mutations ( <i>Mrf<sup>*</sup></i> ); <i>kan<sup>r</sup></i>                                                                                                       | This study |
| Name | Strains                  | Remarks                                                                                                                                                                                                                               | Reference  |
|      | <i>mc<sup>2</sup>155</i> | High-Frequency Transformation strain of <i>M. smegmatis</i> as parent wild-type                                                                                                                                                       | (1)        |
|      | $\Delta c$ -             | Unmarked $\Delta c$ - operon ( <i>Msmeg_6065-6070</i> ) in <i>mc<sup>2</sup>155</i>                                                                                                                                                   | (1)        |
| WT   | wild type                | Unmarked $\Delta c$ - operon ( <i>Msmeg_6065-6070</i> ) harboring pYL42; <i>kan<sup>r</sup></i>                                                                                                                                       | This study |
| YL1  | $\Delta mrf$             | Unmarked $\Delta c$ - operon harboring pYL40; <i>hyg<sup>r</sup></i>                                                                                                                                                                  | This study |
| YL2  | $\Delta mrfcomp$         | Unmarked $\Delta c$ - operon harboring pYL40 and pYL155; <i>hyg<sup>r</sup></i> , <i>kan<sup>r</sup></i>                                                                                                                              | This study |
| YL3  | $\Delta mpy$             | Unmarked $\Delta mpy$ ( <i>Msmeg_1878</i> ) in <i>mc<sup>2</sup>155</i>                                                                                                                                                               | (1)        |
| YL4  | $\Delta mpy/\Delta mrf$  | Unmarked $\Delta c$ - operon / $\Delta Msmeg_1878$ harboring pYL40; <i>zeo<sup>r</sup></i> , <i>hyg<sup>r</sup></i>                                                                                                                   | This study |
| YL5  | $\Delta zur$             | Unmarked $\Delta zur$ ( <i>Msmeg_4487</i> ) in <i>mc<sup>2</sup>155</i>                                                                                                                                                               | (1)        |
| YL6  | $\Delta zur/\Delta mrf$  | Unmarked $\Delta c$ - operon $\Delta zur$ harboring pYL40; <i>hyg<sup>r</sup></i>                                                                                                                                                     | This study |

|      |                                          |                                                                                                                         |            |
|------|------------------------------------------|-------------------------------------------------------------------------------------------------------------------------|------------|
| YL7  | $\Delta mrf$ : pYL156                    | $\Delta mrf$ harboring pYL156; <i>kan<sup>r</sup></i>                                                                   | This study |
| YL8  | $\Delta mrf$ : pYL150                    | $\Delta mrf$ harboring pYL150; <i>kan<sup>r</sup></i>                                                                   | This study |
| YL9  | CRISPRi-CipP1                            | $\Delta zur$ harboring pYL181 and pYL206; <i>apr<sup>r</sup>, kan<sup>r</sup></i>                                       | This study |
| YL10 | CRISPRi-CipP2                            | $\Delta zur$ harboring pYL181 and pYL205; <i>apr<sup>r</sup>, kan<sup>r</sup></i>                                       | This study |
| YL11 | $\Delta zur/\Delta mrf/\Delta clpS$      | $\Delta c$ - operon/ $\Delta zur/\Delta clps$ harboring pYL40; <i>kan<sup>r</sup></i>                                   | This study |
| YL12 | Mrf <sup>H36A/H41A/H62A/H81A</sup>       | $\Delta zur/\Delta mrf$ harboring pYL185; <i>hyg<sup>r</sup>, kan<sup>r</sup></i>                                       | This study |
| YL13 | Mrf <sup>C64A/C67A</sup>                 | $\Delta zur/\Delta mrf$ harboring pYL157; <i>hyg<sup>r</sup>, kan<sup>r</sup></i>                                       | This study |
| YL14 | $\Delta clps/\Delta mrf$                 | Unmarked $\Delta msmc$ -/ $\Delta Msmeg$ _4910 harboring pYL40; <i>hyg<sup>r</sup></i>                                  | This study |
| YL15 | YL14: pYL155                             | $\Delta clps/\Delta mrf$ harboring pYL40 and pYL155; <i>hyg<sup>r</sup>, kan<sup>r</sup></i>                            | This study |
| YL16 | YL9: pYL216                              | $\Delta zur$ harboring pYL181, pYL206 and pYL216; <i>hyg<sup>r</sup>, apr<sup>r</sup>, kan<sup>r</sup></i>              | This study |
| YL17 | CRISPRi-CipP1-Mrf*                       | $\Delta zur$ harboring pYL206, pYL212, pYL216; <i>hyg<sup>r</sup>, apr<sup>r</sup>, kan<sup>r</sup></i>                 | This study |
| YL18 | YL1: pYL141                              | $\Delta c$ - operon harboring pYL40 and pYL141; <i>hyg<sup>r</sup>, kan<sup>r</sup></i>                                 | This study |
| YL19 | YL6: pYL141                              | $\Delta c$ - operon/ $\Delta zur$ harboring pYL40 and pYL141; <i>hyg<sup>r</sup>, kan<sup>r</sup></i>                   | This study |
| YL20 | YL6: pYL155 (Mrf)                        | $\Delta c$ - operon/ $\Delta zur$ harboring pYL40 and pYL155; <i>hyg<sup>r</sup>, kan<sup>r</sup></i>                   | This study |
| YL21 | YL6: pYL178 (Mrf*)                       | $\Delta zur/\Delta mrf$ harboring pYL40 and pYL178; <i>hyg<sup>r</sup>, kan<sup>r</sup></i>                             | This study |
| YL22 | $\Delta clps$                            | Unmarked $\Delta Msmeg$ _4910 in mc <sup>2</sup> 155                                                                    | This study |
| YL24 | YL11: pYL155                             | $\Delta c$ - operon/ $\Delta zur/\Delta clps$ harboring pYL40; <i>hyg<sup>r</sup>, kan<sup>r</sup></i>                  | This study |
| YL25 | YL4: pYL155                              | $\Delta c$ - operon/ $\Delta mpy$ harboring pYL40 and pYL155; <i>zeo<sup>r</sup>, hyg<sup>r</sup>, kan<sup>r</sup></i>  | This study |
| YL26 | YL4: pYL141                              | $\Delta c$ - operon / $\Delta mpy$ harboring pYL40 and pYL141; <i>zeo<sup>r</sup>, hyg<sup>r</sup>, kan<sup>r</sup></i> | This study |
| YL27 |                                          | mc <sup>2</sup> 155 harboring pYL218 and pYL206; <i>hyg<sup>r</sup>, kan<sup>r</sup></i>                                | This study |
| YL28 | YL1: Mrf*                                | $\Delta mrf$ harboring pYL178; <i>hyg<sup>r</sup>, kan<sup>r</sup></i>                                                  | This study |
| YL35 | YL1: pYL222                              | $\Delta mrf$ harboring pYL222; <i>hyg<sup>r</sup>, kan<sup>r</sup></i>                                                  | This study |
|      | mc <sup>2</sup> 7000                     | <i>M. tuberculosis</i> H37Rv: $\Delta RD1$ : $\Delta panCD$ as parent wild type                                         | (1)        |
|      | Mtb(Erd)                                 | <i>M. tuberculosis</i> Erdman, ATCC 35801                                                                               | (1)        |
| YL29 | mc <sup>2</sup> 7000: $\Delta mpy_{mtb}$ | $\Delta Rv$ _3241c in mc <sup>2</sup> 7000                                                                              | This study |
| YL30 | $\Delta mpy_{mtb}$ Comp                  | $\Delta Rv$ _3241c harboring pYL148 in mc <sup>2</sup> 7000                                                             | This study |
| YL31 | $\Delta mrf_{mtb}$                       | $\Delta Rv$ _0106 in mc <sup>2</sup> 7000                                                                               | This study |
| YL32 | $\Delta mrf_{mtb}$ Comp                  | $\Delta Rv$ _0106 harboring pYL149 in mc <sup>2</sup> 7000                                                              | This study |
| YL33 | $\Delta mpy_{mtb}$ (Erd)                 | $\Delta Rv$ _3241c in Mtb(Erd)                                                                                          | This study |
| YL34 | $\Delta mpy_{mtb}$ Comp (Erd)            | $\Delta Rv$ _3241c harboring pYL148 in Mtb(Erd)                                                                         | This study |

384

385

386

387 **Table S2: List of oligonucleotides**

| Name            | Sequence                                              | Used in: |
|-----------------|-------------------------------------------------------|----------|
| p1878-NF        | AGAAACGAGTTGCCACATATGTCAAGCCATTCGATG                  | pYL140   |
| p1878-HR        | GTGCTGGTCGGCAAGCTTGCCAGGCGGATCAGCCC                   |          |
| pRv3241c-F      | ATGTCAAGGCTACATATGGATTCAGGTCAGGTTCTG                  | pYL146   |
| pFlagRv3241c-NR | GGCCGGGCTAGCTCACTTATCGTCGTATCCTTGTAATCCGCCAGACGGATCAA |          |
| pRv3241c-SF     | ATTTGTTTCGCGGAGCTCCGCTACGCGGGCGTGCCTG                 | pYL148   |
| pRv3241c-XR     | GCGGCGCGCGCTTAGATCACGCCAGACGGATCAA                    |          |
| pRv0106-SF      | GAGTCCTTGATGGAGCTCCGGTCTTGCACTCGTGGG                  |          |

|                        |                                                         |                            |
|------------------------|---------------------------------------------------------|----------------------------|
| pRv0106-XR             | GGATGGATACCGTCTAGATCATCGAGATTCTCCTGA                    | pYL149                     |
| <i>Pzurbox</i> 6069-XF | CGCGCCGTTTCGTCTAGACGCTGCACCAGTTCTCGCC                   |                            |
| p6069FLAGNR            | GGCCGGGCTAGCTCACTTATCGTCGTCATCCTTGTAAATCCGATTGCTCTCCTGT | pYL150                     |
| <i>Pzurbox</i> 6069-SF | CGCGCCGTTTCGGAGCTCCGCTGCACCAGTTCTCGCC                   | pYL155;156,157;178;181,185 |
| p6069FLAGXR            | GGCCGGTCTAGATCACTTATCGTCGTCATCCTTGTAAATCCGATTGCTCTCCTGT |                            |
| <i>Pzurbox</i> 6069-XF | CGCGCCGTTTCGTCTAGACGCTGCACCAGTTCTCGCC                   |                            |
| p6069-HR               | GGTGGATGCCGGAAGCTTCGATTGCTCTCCTGTCTG                    |                            |
| His1-R                 | GGTGCAGACGACGACAGCGCCGTCGAAGGTGGCGCTGACGAGCAGGGT        | pYL157; pYL178; pYL185     |
| His1-F                 | ACCCTGCTCGTCAGCGCCACCTTCGACGGCGCTGTCGTCGTCGCCACC        |                            |
| His2-R                 | GGCCGAGACGGCTCCGGCCACCAGCTCAAGTAC                       |                            |
| His2-F                 | GTACTTGAGCTGGTGGCCGGAGCCGTCTCGGCC                       |                            |
| His3-R                 | CACGTCGGCGCGCCGGGCCAGACGGCGAAGCAGGAT                    |                            |
| His3-F                 | ATCCTGCTTCGCCGTCTGGCCCGCGCGCCGACGTG                     |                            |
| p6069-CXXCR            | ATCGTCACGCACGGTGGCCGAGACGGCTCCGTGCACCAGCTC              |                            |
| p6069-CXXCF            | GAGCTGGTGCACGGAGCCGTCTCGGCCACCGTGCCTGACGAT              |                            |
| pApr-PF                | ATAACTTCGTATCTGCAGCATTATACGAAGTTATAG                    | pYL180                     |
| pApr-SR                | GTTACAATTCGCGATCGCTCGACTCGTTCTCCGCTC                    |                            |
| P6069(ATG)-NF          | AAACCGGGAGGTCATATGCGTACGCCGGTAGTGCTG                    | pYL210, pYL222             |
| p6069-NFLAGR           | GGATGCGCTAGCTCACTTATCGTCGTCATCCTTGTAAATCCGATTGCTCTCCTGT |                            |
| p4910-NF               | GGGTATTGTGGCCATATGGTTACACCGGCGAAGGCG                    |                            |
| p4910-HISNR            | CTTGCGCACGCTAGCTCAGTGGTGGTGGTGGTGGCGGTCTGTTGCAT         | pYL216                     |
| p4910ZeoA              | TGCGTCAGGGCTTCGAGGAACCGCG                               | $\Delta clpS$              |
| p4910ZeoB              | TGGTGAGGGAGATGAGGTCTGAAGGACATCGACTTCTTCT                |                            |
| p4910ZeoC              | GTTGAGGTGTGAGGTGTGCTGAAGTCCAAACTGCACGCCG                |                            |
| p4910ZeoD              | GGCCGGAAGAAATCCGGCAGCAGAC                               |                            |
| p4910SA                | GTAGTCGAGCGTGTGGCGTTCGAGA                               |                            |
| p4910SD                | TTGAGGCTCTCCGCGGTGCCCGA                                 |                            |
| RT-6069F               | TCCAGCGAGCTTGCCTACACGGA                                 | RT-PCR_MsMrf               |
| RT-6069R               | ACGCAGTGCCTCGAGGATGTCGT                                 |                            |
| RT-6068F               | CCGAGACGCTGGGACCCCAATA                                  | RTPCR_MsL28c               |
| RT-6068R               | GGTCGATCACCTTGATGCCTT TTGC                              |                            |
| RT-sigA(MS)F           | AAGGCGTCCGGCGACTTCGTGT                                  | RTPCR_MsSigA               |
| RT-sigA(MS)R           | TCCACCTCTTCTTCGGCGTTGAGC                                |                            |
| RT-2058F               | GTCCGCCCACTGCCAAGTCACC                                  |                            |

|              |                         |               |
|--------------|-------------------------|---------------|
| RT-2058R     | CGTGGACACCCGCAGCCGAATGC | RTPCR_MtL28c  |
| RT-sigA(TB)F | TGGCAGCGACCAAAGCAAGCACG | RTPCR_MtbSigA |
| RT-sigA(TB)R | GGAGCCACTAGCGGACTTCGCC  |               |
| RT-clpp1F    | CTCGGTGTACGAGCGGCTGC    | RTPCR_MsClpp1 |
| RT-clpp1R    | CAGGTGGATGTCCTTGGTCGGAT |               |
| RT-clpp2F    | TCCGTCACTGGACGCCCGGCTG  | RTPCR_MsClpp2 |
| RT-clpp2R    | CACGCCGAGGAAGATGATGCGT  |               |

388

389 **Supplemental References**

390

391 1. Y. Li *et al.*, Zinc depletion induces ribosome hibernation in mycobacteria. *Proc Natl*  
392 *Acad Sci U S A* **115**, 8191-8196 (2018).

393 2. Y. Yang *et al.*, A hydrolase of trehalose dimycolate induces nutrient influx and  
394 stress sensitivity to balance intracellular growth of *Mycobacterium tuberculosis*.  
395 *Cell host & microbe* **15**, 153-163 (2014).

396 3. G. F. Hatfull, Mycobacteriophages. *Microbiol Spectr* **6** (2018).

397 4. J. M. Rock *et al.*, Programmable transcriptional repression in mycobacteria using  
398 an orthogonal CRISPR interference platform. *Nat Microbiol* **2**, 16274 (2017).

399 5. P. Mehta, P. Woo, K. Venkataraman, A. W. Karzai, Ribosome purification  
400 approaches for studying interactions of regulatory proteins and RNAs with the  
401 ribosome. *Methods in molecular biology* **905**, 273-289 (2012).

402 6. M. A. Zundel, G. N. Basturea, M. P. Deutscher, Initiation of ribosome degradation  
403 during starvation in *Escherichia coli*. *RNA* **15**, 977-983 (2009).

404 7. J. C. van Kessel, G. F. Hatfull, Recombineering in *Mycobacterium tuberculosis*.  
405 *Nature methods* **4**, 147-152 (2007).

406

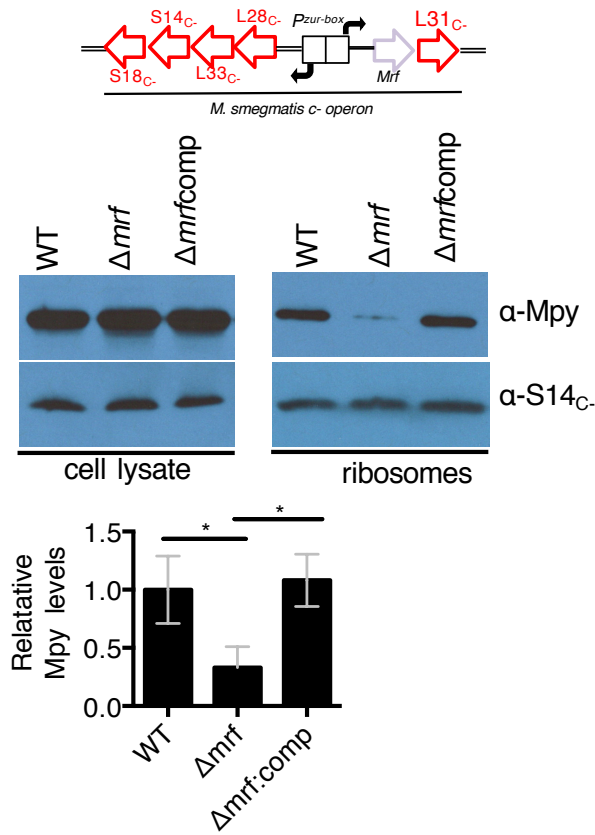

**Figure S1: FLAG-tagged Mrf complements  $\Delta mrf$  mutant.** Levels of Mpy associated with the ribosome in WT,  $\Delta mrf$ , and complemented strains (YL2). WT denotes the parent strain with wildtype phenocopy, carrying unmarked deletion in the *c*-operon (top) and expressing the *c*-operon on an integrative plasmid (pYL42).  $\Delta mrf$  strain is a derivative of WT carrying an in-frame deletion in *mrf* in the operon (pYL40); the complemented strain (YL2) is  $\Delta mrf$  expressing FLAG-tagged Mrf (called Mrf in the manuscript) from the native promoter on an integrative plasmid. The indicated strains were cultured in low-zinc Sauton's medium ( $1\mu\text{M}$  TPEN) for 96 hours prior to Mpy analysis in cell lysates and purified ribosomes. S14<sub>C</sub> was probed as control. The plot below shows average Mpy levels in ribosomes (normalized to S14<sub>C</sub>) in three biologically independent experiments; \* denotes  $p$  (t-test) < 0.05.

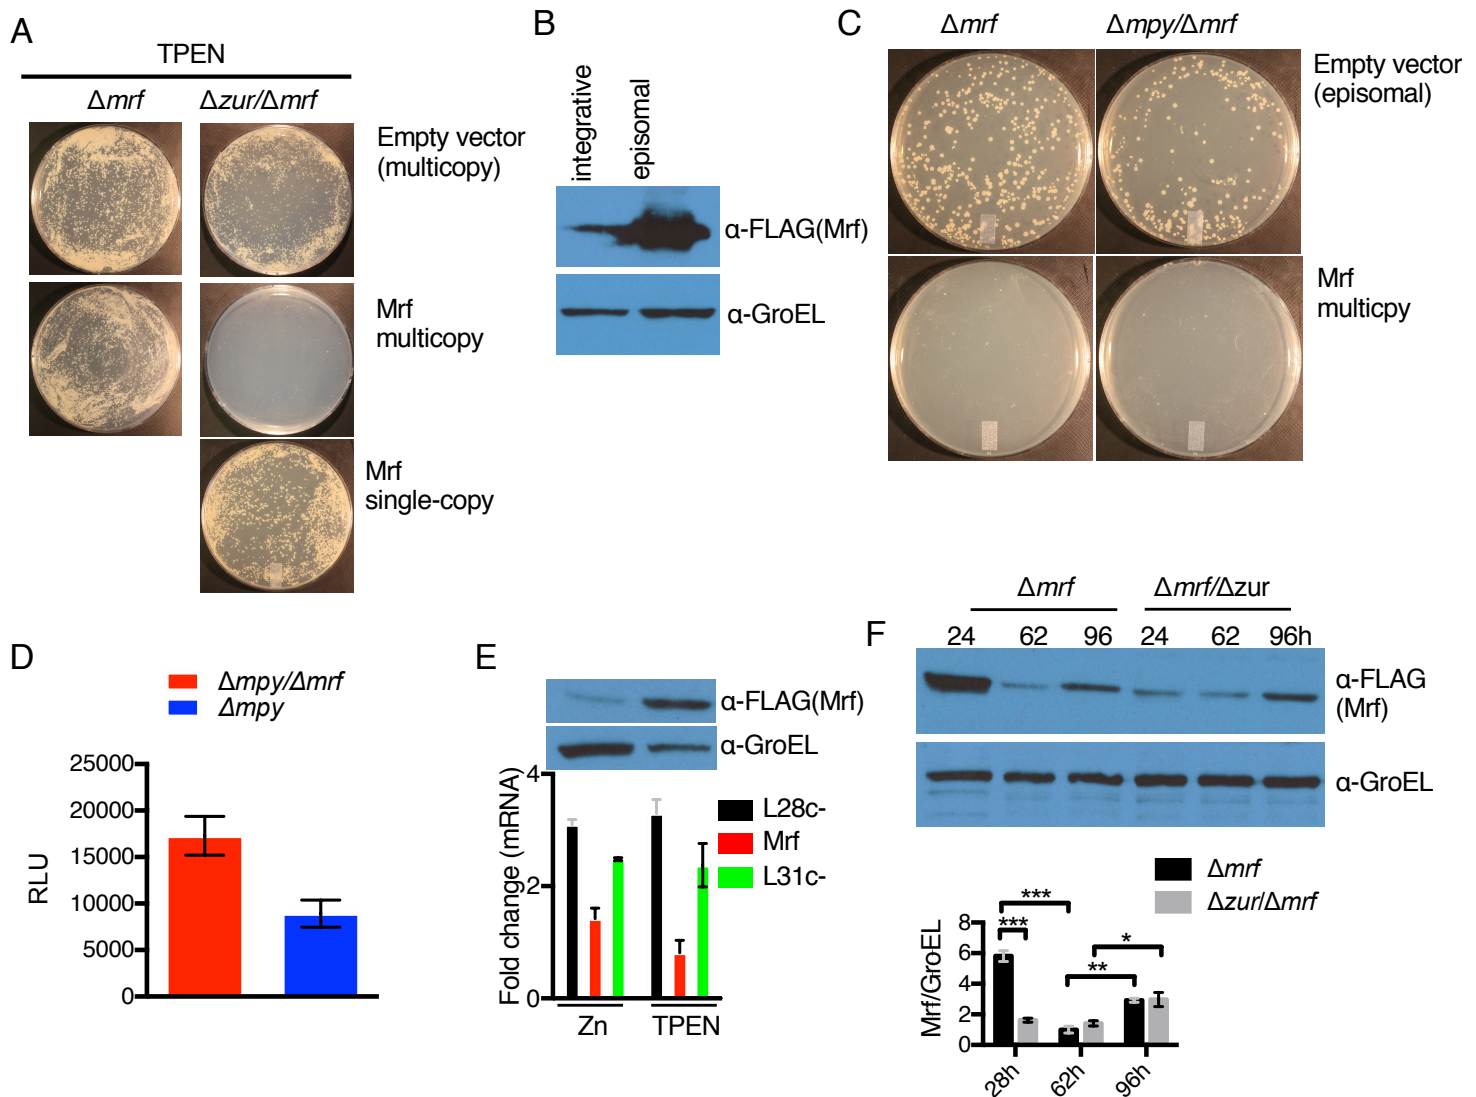

**Figure S2: Post-transcriptional regulation of Mrf.** **A.** Plating efficiency of the indicated mutants of *M. smegmatis*, transformed either with an integrative (YL155) or a multicopy episomal (pYL141) plasmid expressing Mrf from the native (*Pzurbox*) promoter, on Sauton's agar plates containing 1  $\mu$ M TPEN. **B.** Levels of Mrf expressed from *Pzurbox* on either an integrative (pYL155) or episomal (pYL141) plasmid in a  $\Delta mrf$  strain cultured in low-zinc medium for 96-hour. GroEL level was probed as loading control. **C.** Mpy-independent toxicity of multicopy Mrf expressed from episomal plasmid pYL150. Transformants were plated on Sauton's agar plates containing 1  $\mu$ M TPEN. Empty vector (pJL37) was used as control. **D.** Effect of Mrf on the translation activity of purified C-ribosomes at a sub-saturating concentration (12.5nM). The activity was determined by a nano-luciferase based *in vitro* transcription-translation assay, which reports relative luminescence unit (RLU). Data represents mean  $\pm$  SD of two biologically independent preparation of ribosomes. **E.** Zinc-dependent loss of stability of constitutively expressed Mrf is independent of C- ribosomes. Constitutive expression was achieved from pYL155 in  $\Delta mrf/\Delta zur$  mutant. The plot shows relative mRNA levels of Mrf and L31<sub>C</sub> and L28<sub>C</sub> of the *c*- operon, from either high- or low-zinc cultures after 96 hours of growth. The immunoblot above shows corresponding protein level of Mrf in the same samples used for the mRNA analyses. **F.** Levels of Mrf expressed from pYL155 in  $\Delta mrf$  and  $\Delta mrf/\Delta zur$  strains at the indicated timepoints of growth. GroEL was probed as loading control. The plot below shows average Mrf levels (normalized to GroEL) in each sample.

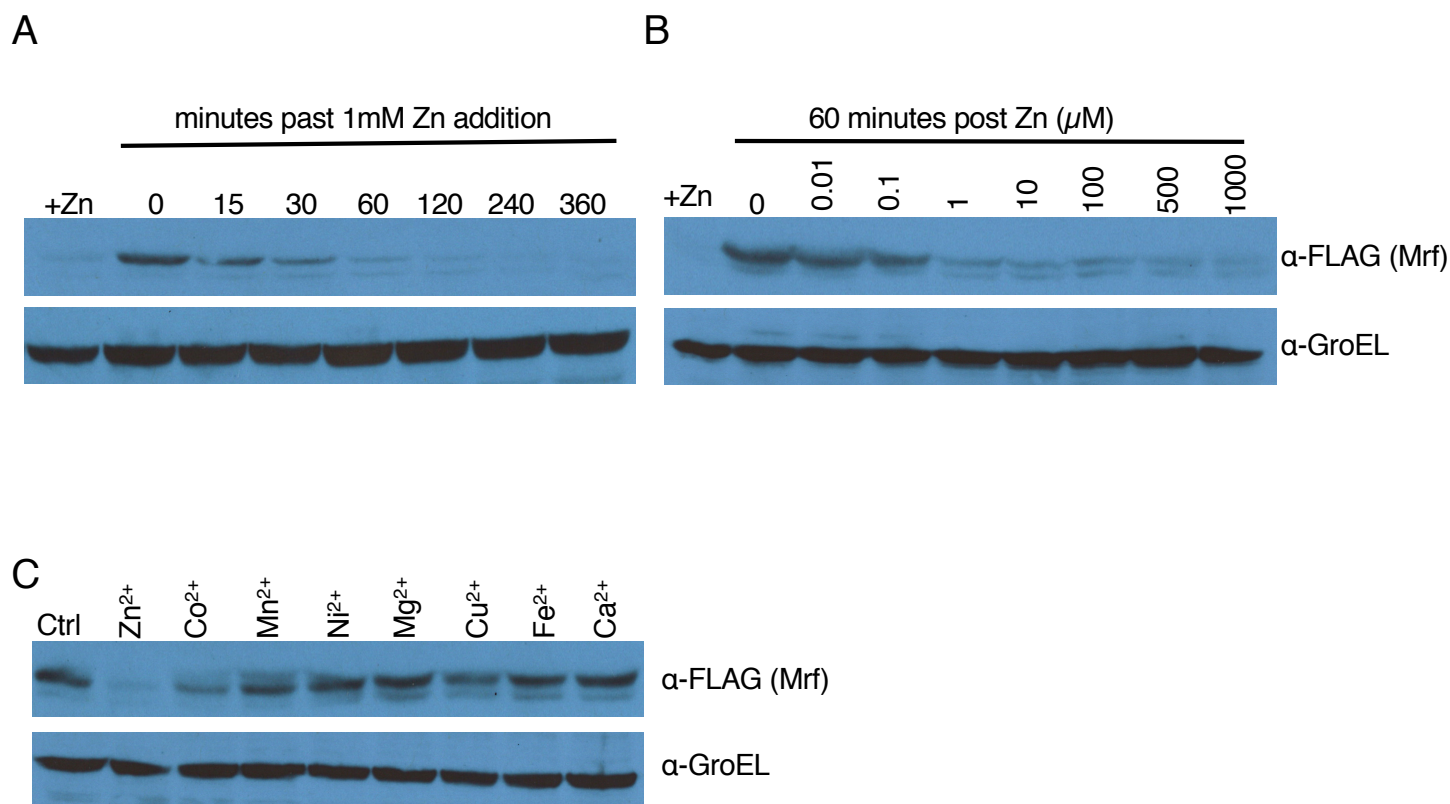

**Figure S3: Stability of Mrf is reversed by reintroduction of zinc. A-B.** Time (A) and concentration (B) dependent restoration of Mrf instability upon addition of zinc. *M. smegmatis* strain YL23 (Mrf expressed from pYL155 in  $\Delta zur/\Delta mrf$ ), was cultured for 96 hours in Sauton's medium with  $1\mu\text{M}$  TPEN. Subsequently, zinc was added to the culture either at a fixed concentration for indicated time periods (A), or for one hour at the indicated concentration (B). A parallel culture grown in  $1\text{mM}$   $\text{ZnSO}_4$  (denoted as +Zn) was used as control in both the experiments. **C.** Zinc-specific degradation of Mrf. 96-hour old cultures of the *M. smegmatis* strain used for panels A and B experiments were exposed to indicated metal ions at  $10\mu\text{M}$  concentration for 60 minutes and Mrf in cell lysates was monitored. GroEL was probed as the loading control.



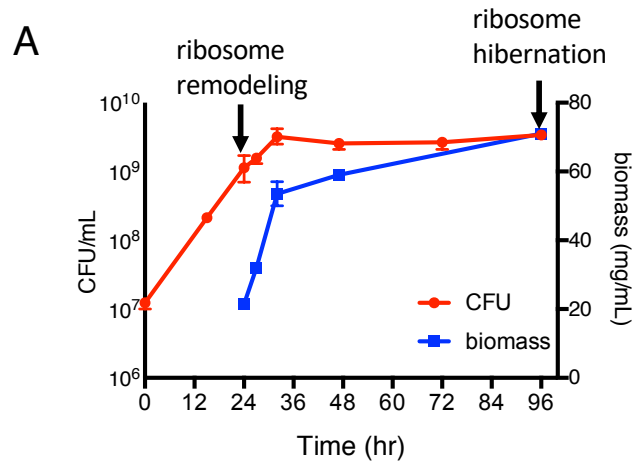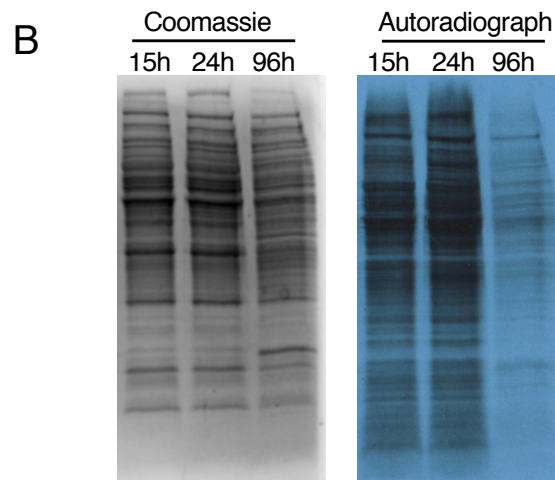

**Figure S4: Ribosome remodeling maintains cellular growth and protein synthesis.** **A.** Growth of *M. smegmatis* cells in Sauton's medium containing 1  $\mu$ M TPEN measured over 96 hours. Both colony forming unit (CFU) and biomass of the culture were determined at the indicated timepoints. Data represent average of three biologically independent experiments. The timepoints at which expression of C- ribosomes (remodeling) and recruitment of Mpy (hibernation) are indicate by arrows. **B.** Incorporation of <sup>35</sup>S-methionine over a 10-minute period in 15-, 24-, and 96-hour cells, representing the growth phases associated with pre-remodeling, remodeled and hibernating ribosomes, respectively. YL2 cells at the indicated stages were labeled with 10  $\mu$ Ci/mL of <sup>35</sup>S-methionine, and 5  $\mu$ g of total proteins from the lysates were resolved on SDS-PAGE and visualized by Coomassie blue stain as well as autoradiography.

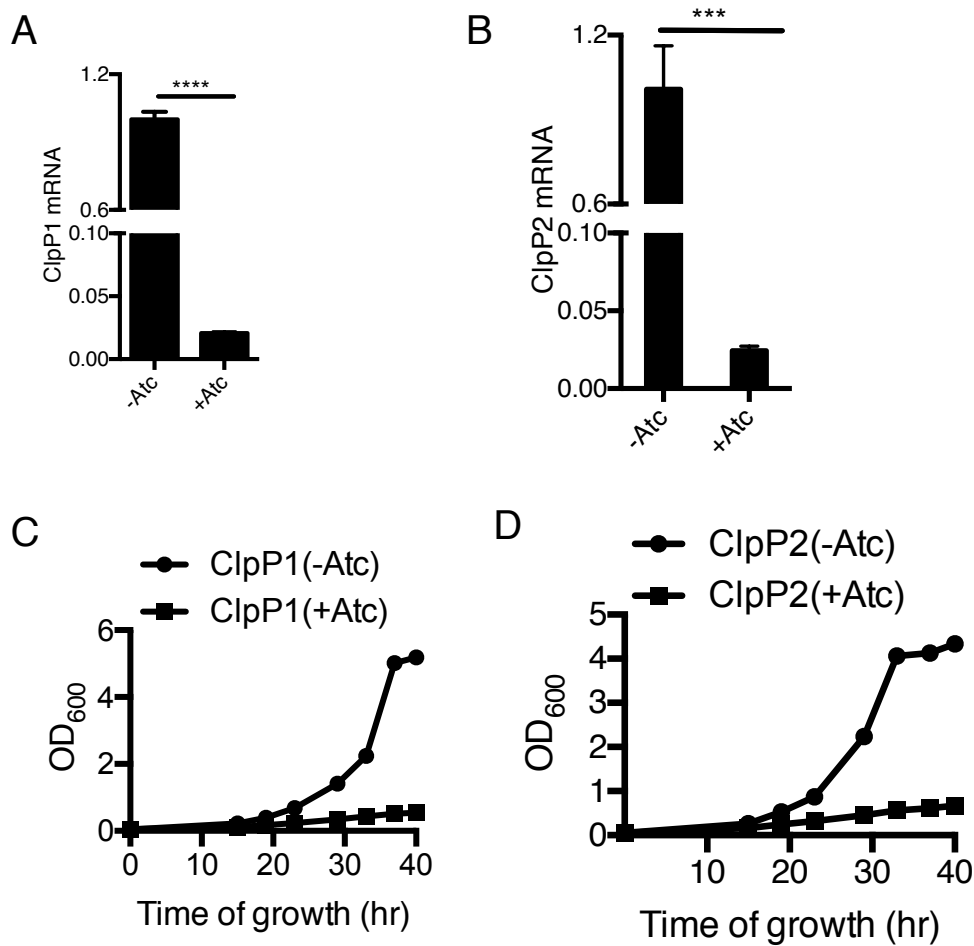

**Figure S5: CRISPRi mediated depletion of ClpP1 and ClpP2 in *M. smegmatis*.** An integrative plasmid carrying tetracycline-inducible dCas9 and gRNA complementary to either ClpP1 in YL9 strain (panel A and C) or ClpP2 in YL10 strain (panel B and D). **A-B.** Transcription inhibition of ClpP1 (A) and ClpP2 (B) upon induction of CRISPRi by anhydrotetracycline (Atc). mRNA levels were normalized with SigA as an endogenous control. **C-D.** Growth inhibition of the strains in medium containing Atc.

A

|                    |              |
|--------------------|--------------|
| Mrf <sub>Msm</sub> | MRTPVVLV.... |
| Mrf <sub>Mtb</sub> | MRTPVILV.... |
| Mrf <sub>Mbo</sub> | MRTPVILV.... |
| Mrf <sub>Mab</sub> | MRTPVLLV.... |
| Mrf <sub>Mma</sub> | MRTPVVLV.... |

B

Raw pmol table (Mrf from low Zn culture)

|   | ASP   | ASN   | SER   | GLN   | THR   | GLY   | GLU   | HIS   | ALA   | ARG   | TYR   | PRO   | MET   | VAL   | TRP   | PHE   | ILE   | LYS   | LEU   |
|---|-------|-------|-------|-------|-------|-------|-------|-------|-------|-------|-------|-------|-------|-------|-------|-------|-------|-------|-------|
| 1 | 1.9   | 0.0   | 3.1   | 7.9   | 4.0   | 8.3   | 1.3   | 0.6   | 2.854 | 4.154 | 0.900 | 2.749 | 134.9 | 0.000 | 0.184 | 0.417 | 0.406 | 1.462 | 1.245 |
| 2 | 4.704 | 1.269 | 2.892 | 2.918 | 4.856 | 6.913 | 63.13 | 0.571 | 7.929 | 58.38 | 1.259 | 5.299 | 3.561 | 4.698 | 0.354 | 1.430 | 1.781 | 1.226 | 4.856 |
| 3 | 10.49 | 46.56 | 3.446 | 3.937 | 81.34 | 8.337 | 11.21 | 0.836 | 13.96 | 28.08 | 1.133 | 7.120 | 0.568 | 9.642 | 1.154 | 3.049 | 2.701 | 2.085 | 12.10 |
| 4 | 12.65 | 7.278 | 4.585 | 5.876 | 14.03 | 11.90 | 9.742 | 1.519 | 21.35 | 21.24 | 1.717 | 53.02 | 0.695 | 14.35 | 1.982 | 3.494 | 3.438 | 65.85 | 20.44 |
| 5 | 14.46 | 1.411 | 5.849 | 6.894 | 10.40 | 14.82 | 11.36 | 2.151 | 27.91 | 22.14 | 1.949 | 59.53 | 0.773 | 72.58 | 3.147 | 4.467 | 4.529 | 9.904 | 22.71 |

C

Raw pmol table (Mrf from high Zn culture)

|   | ASP   | ASN   | SER   | GLN   | THR   | GLY   | GLU   | HIS   | ALA   | ARG   | TYR   | PRO   | MET   | VAL   | TRP   | PHE   | ILE   | LYS   | LEU   |
|---|-------|-------|-------|-------|-------|-------|-------|-------|-------|-------|-------|-------|-------|-------|-------|-------|-------|-------|-------|
| 1 | 3.355 | 0.430 | 2.647 | 0.000 | 0.000 | 4.646 | 2.009 | 1.131 | 4.041 | 4.502 | 1.430 | 3.898 | 60.67 | 0.000 | 0.334 | 0.740 | 1.121 | 1.502 | 2.036 |
| 2 | 5.524 | 0.485 | 2.717 | 2.999 | 2.616 | 4.668 | 3.249 | 0.788 | 6.201 | 70.88 | 1.114 | 5.086 | 2.414 | 3.447 | 0.149 | 1.398 | 1.466 | 0.870 | 5.037 |
| 3 | 8.249 | 0.652 | 3.302 | 3.487 | 78.66 | 5.977 | 4.743 | 0.776 | 9.102 | 28.66 | 1.615 | 5.827 | 0.651 | 5.981 | 0.621 | 2.379 | 2.029 | 1.130 | 8.845 |
| 4 | 11.41 | 0.840 | 4.092 | 4.912 | 12.04 | 8.110 | 6.075 | 0.908 | 12.70 | 16.88 | 2.303 | 44.65 | 0.630 | 8.055 | 0.980 | 2.647 | 2.289 | 1.889 | 10.19 |
| 5 | 12.18 | 1.024 | 5.104 | 5.780 | 7.038 | 9.740 | 7.144 | 1.157 | 16.05 | 15.60 | 2.780 | 15.01 | 0.802 | 57.40 | 1.506 | 3.491 | 2.698 | 2.482 | 13.09 |

**Figure S6: Characterization of N-terminal sequence of Mrf in high- and low-zinc cultures of *M. smegmatis*.** **A.** Predicted first eight amino acid sequence of Mrf from *M. smegmatis* (Msm), *M. tuberculosis* (Mtb), *M. bovis* (Mbo), *M. abscessus* (Mab) and *M. marinum* (Mma). **B&C.** Edman degradation-based sequencing of first five amino acids of Mrf purified from either high-zinc cultures of YL27 or low-zinc culture of YL18. ClpP1 in YL27 was depleted by 16-hour Atc treatment to obtain Mrf in high-zinc culture. The values correspond to pmoles of each amino acid detected at the indicated cycle. Values for predicted amino acids are marked in red.

A

|          | Protein ( $\mu\text{M}$ ) | Zn ( $\mu\text{M}$ ) | Ratio (Zn/Mrf) |
|----------|---------------------------|----------------------|----------------|
| Mrf - Zn | 22.4                      | 1.82 (0.08)          | 0.08           |
| Mrf + Zn | 6.79                      | 18.07 (0.13)         | 2.6            |
| Mrf + Zn | 5.2                       | 12.83 (0.07)         | 2.5            |

B

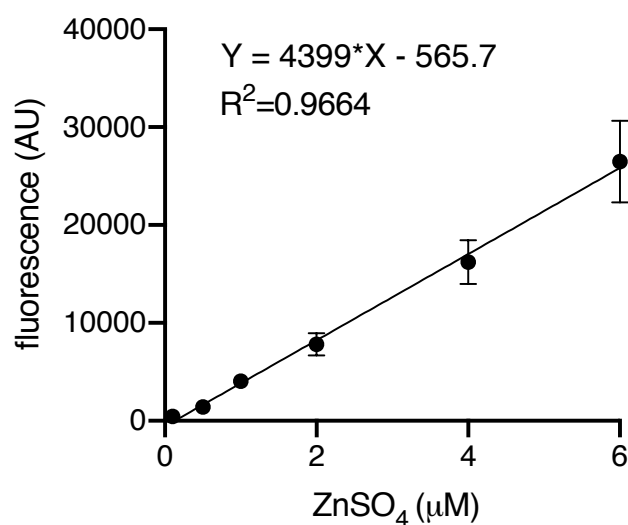

**Figure S7: Zinc binding in Mrf and FluoZin-3.** **A.** ICP-MS based analysis of zinc binding in Mrf. Mrf was purified from YL18 in zinc-depleted buffer and dialyzed with 8X molar excess of ZnSO<sub>4</sub>, followed by three sequential dialysis with zinc-depleted buffer. Zinc was measured in the protein before (Mrf -Zn) and after (Mrf + Zn) the dialysis with ZnSO<sub>4</sub>, along with exchange buffers (indicated in parenthesis). Background zinc in the exchange buffer was subtracted prior to calculating Zn/Mrf ratio. Values from two independent zinc treatments of the protein are provided. **B.** A linear relationship between fluorescence signal from 10  $\mu\text{M}$  FluoZin-3 and free zinc in the concentration range of 0.1- 6  $\mu\text{M}$  of ZnSO<sub>4</sub>.

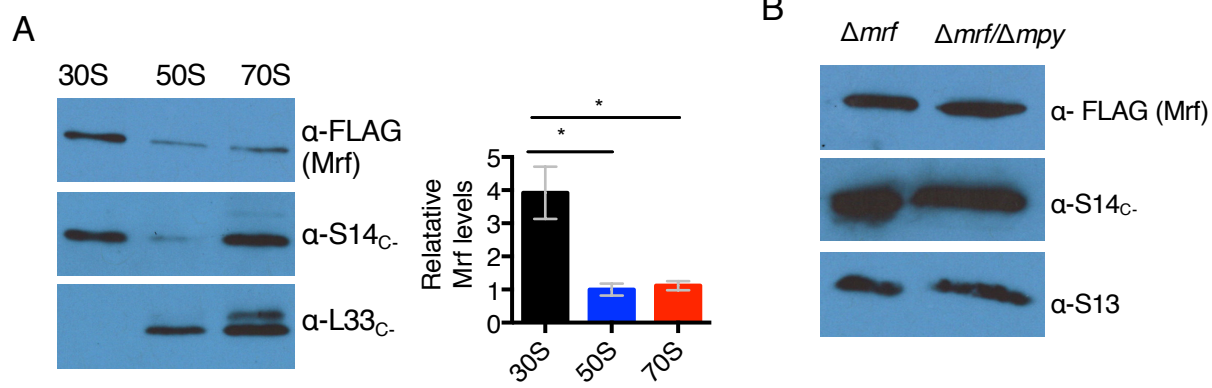

**Figure S8: Mpy-independent binding of Mrf to the 30S subunit of the ribosome . A.** Analysis of Mrf in 2.4 pmoles of the 30S, 50S and 70S particles from YL18 ( $\Delta mrf$  expressing Mrf from the native promoter on a multicopy plasmid) strain described in figure 4A. The plot shows average Mrf density (normalized to the levels in the 50S) from three biologically independent experiments; \* denotes p (t-test) < 0.05. **B.** Mrf levels in 2.4 pmoles of the 30S ribosome in low-zinc cultures of YL18 and its isogenic  $\Delta mpy$  mutant strain YL26.

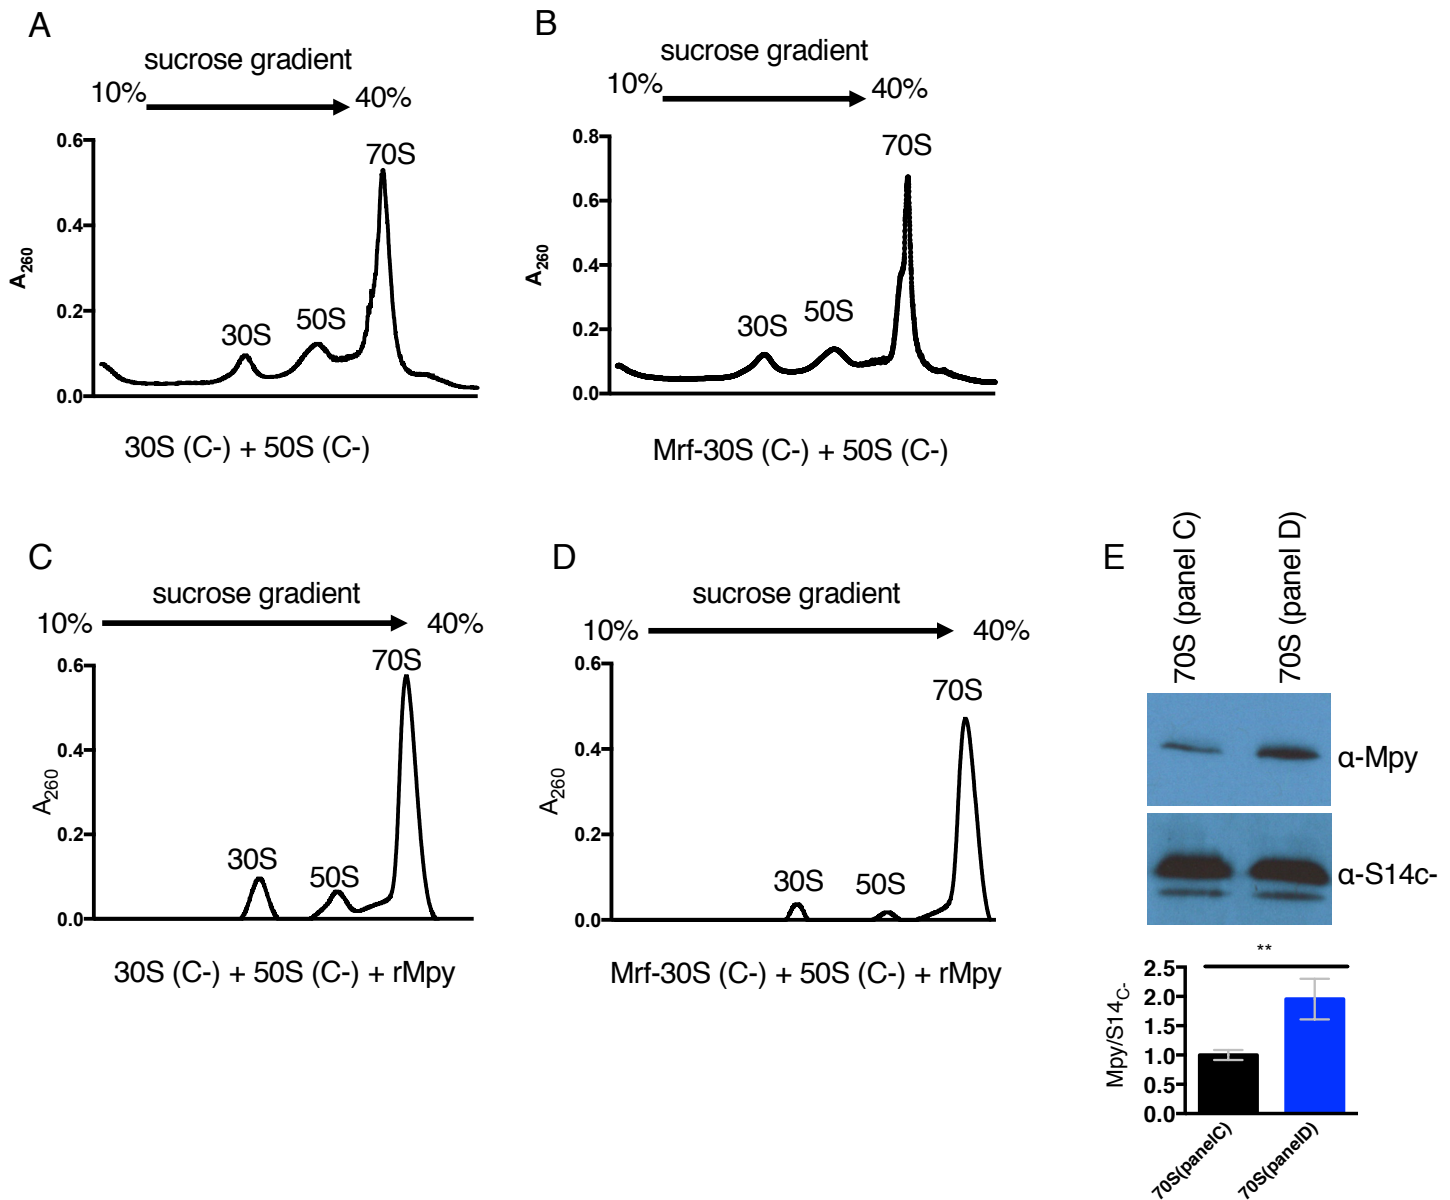

**Figure S9: *In vitro* reconstitution of hibernating ribosomes with purified rMPY, Mrf-30S and 50S subunits.** **A-B.** Spontaneous joining of the C- 50S subunit to either the C- 30S (A) or the C- Mrf-30S (B) subunit. 36 pmoles of the 50S subunit, purified from 96-hour old low-zinc culture of YL4 ( $\Delta mpy/\Delta mrf$ ) were mixed with 36 pmoles of the 30S subunits purified from either YL4 (panel A) or YL25 (derivative of YL4 expressing Mrf from the native promoter on an integrative plasmid) (panel B). After 60-minutes of incubation, the mixture was resolved on the 10-40% SDG. **C-D.** Analysis of 70S upon simultaneous mixing for 30 minutes of rMpy (72 pmoles) with 36 pmoles each of the 50S and 30S subunits, either with (panel D) or without (panel C) Mrf. **E.** Western blot showing the level of rMpy in 70S collected from panels C and D. The plot below shows average Mpy density (relative to S14c-) from three biologically independent assays; \*\* denotes p (t-test) < 0.01.

A

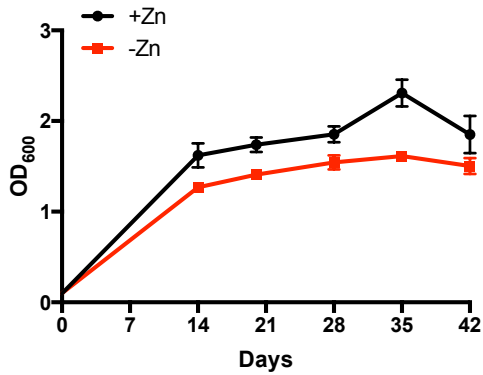

B

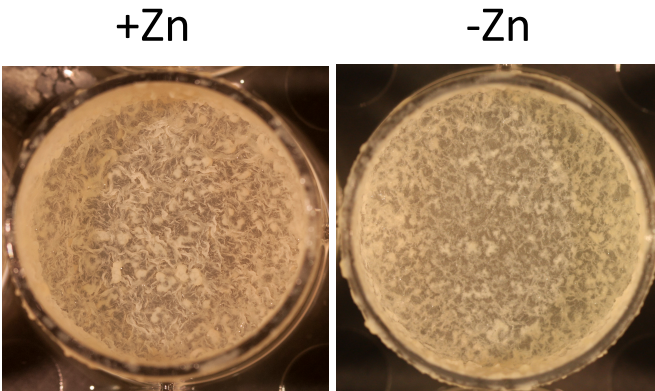

C

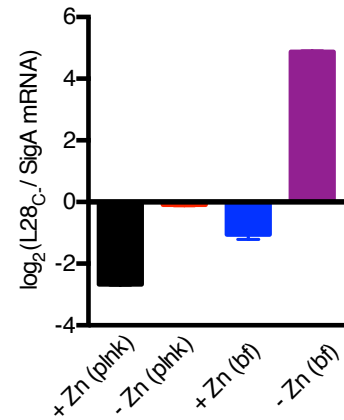

**Figure S10: Growth in biofilm is necessary for high-level induction of C- ribosomes in Mtb. A-B.** Planktonic (A) and pellicle (B) growth of Mtb in Sauton's medium with either 1mM ZnSO<sub>4</sub> (+Zn) or without any zinc supplement (-Zn). Pellicles were grown for 7 weeks. Further depletion of zinc with 1μM TPEN caused severe growth defect in both cultures (not shown). **C.** Analysis of transcripts of *mtb<sub>c-</sub>* operon (represented by L28c-) in total RNA isolated from saturated planktonic cultures or 7-week pellicles described in panels A and B.

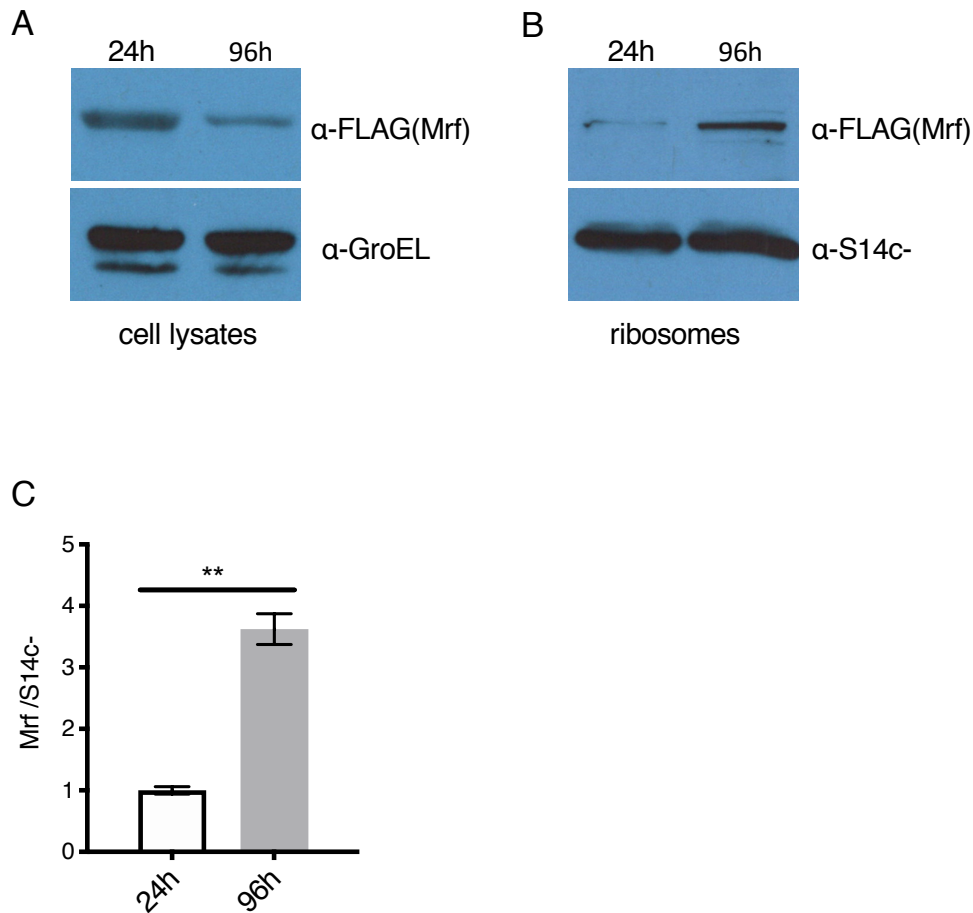

**Figure S11: Comparison of Mrf-ribosome interaction in 24- and 96-hour cells of YL2 strain. A-B.** Levels of Mrf in 10  $\mu$ g of cell lysates (A) and 12 pmoles of ribosomes (B) of YL2 cells from 24- and 96-hour cultures in low zinc medium. GroEL and S14c- were probed as loading controls for cell lysates and ribosomes, respectively. Crude ribosomes were prepared on 32% sucrose cushion for analysis. **C.** The plot shows average Mrf signal (relative to S14c-) in the ribosome from three biologically independent assays; \*\* denotes  $p$  (t-test) < 0.01.
